# Supplementary material for: Updated Review and Meta-Analysis of Probiotics for the Treatment of Clinical Depression: Adjunctive vs. Stand-Alone Treatment
Source: PubMed Central journal article supplement (PMC7915600; doi:10.3390/jcm10040647), 2021-02-08
Supplement: jcm-10-00647-s001.pdf [file jcm-10-00647-s001.pdf]

## Supplementary Material 1

**Table S1.** Study quality assessment using the SIGN tool.

| Criterion                                      | Akka-<br>sheh<br>2015 | Ro-<br>mijn<br>2017 | Kazem<br>i<br>2019 | Ghor-<br>bani<br>2018 | Miyao<br>ka<br>2018 | Rudz<br>ki<br>2019 | Chahwa<br>n<br>2019 |
|------------------------------------------------|-----------------------|---------------------|--------------------|-----------------------|---------------------|--------------------|---------------------|
| Appropriateness and focus of study question    | +                     | +                   | +                  | +                     | +                   | +                  | +                   |
| Assignment to treatment groups is randomised   | +                     | +                   | +                  | +                     | ?                   | +                  | +                   |
| Adequate concealment of allocation             | +                     | +                   | +                  | ?                     | -                   | +                  | +                   |
| Patients, clinicians and assessors are blinded | +                     | +                   | +                  | +                     | -                   | +                  | +                   |
| Similarity of groups at baseline               | ?                     | -                   | +                  | +                     | ?                   | +                  | +                   |
| Similarity of groups during treatment period   | +                     | +                   | +                  | +                     | +                   | +                  | +                   |
| Use of standardised outcome measure            | +                     | +                   | +                  | +                     | +                   | +                  | +                   |
| Intent-to-treat analysis                       | +                     | +                   | +                  | +                     | ?                   | -                  | +                   |
| Allegiance effect minimised                    | +                     | +                   | +                  | +                     | -                   | +                  | ?                   |
| <b>Overall assessment or risk of bias</b>      | <b>low</b>            | <b>low</b>          | <b>low</b>         | <b>low</b>            | <b>high</b>         | <b>low</b>         | <b>low</b>          |

+ low risk, - high risk, ? unclear risk .
